# Supplementary material
Source: PubMed Central journal article supplement (PMC4378094)
Supplement: ASN.2013101086_ASN2013101086SupplementaryData.pdf [file ASN.2013101086_ASN2013101086SupplementaryData.pdf]

**SUPPLEMENTAL TABLE 1**

|                                           | <b>Completed The Study<br/>(n=38)</b> | <b>Dropped Out<br/>(n=35)</b> | <b>P Value</b> |
|-------------------------------------------|---------------------------------------|-------------------------------|----------------|
| <b>Age</b>                                | 57.7±14.80                            | 56.4±16.51                    | 0.748          |
| <b>Gender (Female) %(n)</b>               | 34.2%(13)                             | 40%(14)                       | 0.343          |
| <b>Body Mass Index (Kg/m<sup>2</sup>)</b> | 27.67±5.53                            | 29.01±7.84                    | 0.467          |
| <b>Diabetes Mellitus %(n)</b>             | 21.1%(8)                              | 32.1%(9)                      | 0.391          |
| <b>Ischaemic Heart Disease %(n)</b>       | 23.7%(9)                              | 20%(7)                        | 0.836          |
| <b>Smoking %(n)</b>                       | 26%(10)                               | 34.2%(12)                     | 0.317          |

**Supplemental Table 1. Characteristics of participants who dropped out in comparison to those who completed the study.**

Normally distributed data are presented as mean ± standard deviation; categorical data are presented as percentage (number). Kg/m<sup>2</sup> (kilogram / square meter), n (number).

## SUPPLEMENTAL TABLE 2

|                                                     | Mean FA at Baseline (n=38) | Mean FA at One year (n=38) | Mean FA at Baseline (Significant Voxels) (n=38) | Mean FA at One Year (Significant Voxels) (n=38) | Percentage of Significant Voxels |
|-----------------------------------------------------|----------------------------|----------------------------|-------------------------------------------------|-------------------------------------------------|----------------------------------|
| Anterior Thalamic Radiation- L                      | 0.335±0.030                | 0.340±0.037                | 0.346±0.042                                     | 0.367±0.052                                     | 0.37%                            |
| Anterior Thalamic Radiation- R                      | 0.334±0.030                | 0.337±0.037                | 0.374±0.038                                     | 0.388±0.047                                     | 0.49%                            |
| Corticospinal Tract-L                               | 0.430±0.023                | 0.433±0.028                | No significant voxels                           | No significant voxels                           | 0%                               |
| Corticospinal Tract-R                               | 0.417±0.022                | 0.422±0.026                | No significant voxels                           | No significant voxels                           | 0%                               |
| Cingulate Gyrus-L                                   | 0.304±0.023                | 0.308±0.030                | 0.407±0.058                                     | 0.431±0.066                                     | 0.1%                             |
| Cingulate Gyrus-R                                   | 0.302±0.024                | 0.305±0.029                | 0.445±0.094                                     | 0.467±0.10                                      | 0.03%                            |
| Hippocampus-L                                       | 0.263±0.033                | 0.269±0.035                | 0.504±0.090                                     | 0.512±0.095                                     | 0.08%                            |
| Hippocampus-R                                       | 0.280±0.035                | 0.285±0.039                | 0.441±0.059                                     | 0.455±0.052                                     | 0.16%                            |
| Forceps Major                                       | 0.337±0.025                | 0.340±0.030                | 0.439±0.057                                     | 0.454±0.073                                     | 0.01%                            |
| Forceps Minor                                       | 0.316±0.028                | 0.320±0.034                | 0.418±0.038                                     | 0.433±0.045                                     | 1%                               |
| Inferior Fronto-Ocipital Fasciculus-L               | 0.312±0.026                | 0.317±0.031                | 0.362±0.049                                     | 0.380±0.057                                     | 0.13%                            |
| Inferior Fronto-Ocipital Fasciculus-R               | 0.321±0.025                | 0.323±0.031                | 0.396±0.038                                     | 0.404±0.044                                     | 0.31%                            |
| Inferior Longitudinal Fasciculus- L                 | 0.298±0.022                | 0.302±0.028                | No significant voxels                           | No significant voxels                           | 0%                               |
| Inferior Longitudinal Fasciculus- R                 | 0.290±0.021                | 0.293±0.026                | 0.431±0.051                                     | 0.440±0.059                                     | 0.02%                            |
| Superior Longitudinal Fasciculus- L                 | 0.287±0.020                | 0.290±0.026                | 0.437±0.057                                     | 0.450±0.055                                     | 0.13%                            |
| Superior Longitudinal Fasciculus- R                 | 0.273±0.018                | 0.276±0.022                | 0.390±0.045                                     | 0.398±0.052                                     | 0.02%                            |
| Ucinate Fasciculus-L                                | 0.304±0.027                | 0.308±0.033                | 0.355±0.055                                     | 0.361±0.056                                     | 0.13%                            |
| Ucinate Fasciculus-R                                | 0.304±0.026                | 0.310±0.033                | 0.549±0.83                                      | 0.550±0.113                                     | 0.05%                            |
| Superior Longitudinal Fasciculus- L (Temporal Part) | 0.316±0.026                | 0.317±0.031                | 0.436±0.113                                     | 0.498±0.14                                      | 0.1%                             |
| Superior Longitudinal Fasciculus- R (Temporal Part) | 0.353±0.026                | 0.354±0.030                | No significant voxels                           | No significant voxels                           | 0%                               |

### Supplemental Table 2. Region of Interest Analysis of Fractional Anisotropy.

Region of Interest analysis using John Hopkins University white matter labels atlas demonstrating the changes in regional means of fractional anisotropy and in the statistically significant voxels over one year aggregating both the control and interventional groups. The percentages of the significant voxels in each region are also presented.

## SUPPLEMENTAL FIGURE 1

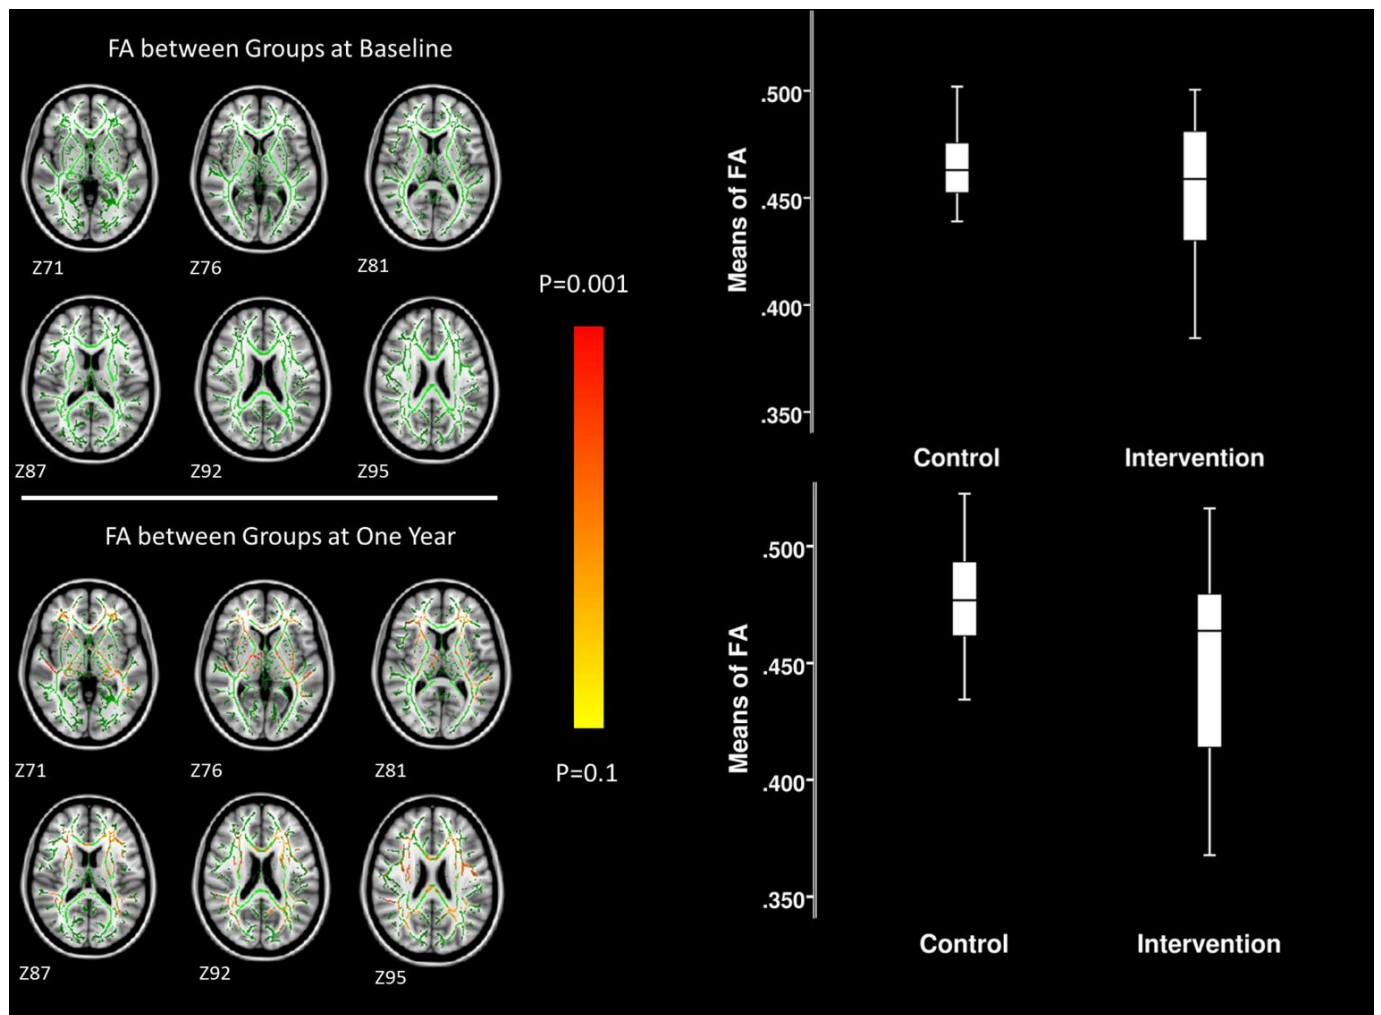

**Supplemental Figure 1.** Statistical image representing the results the voxel wise t-test between group comparison at baseline and one year. The statistically significant voxels with P values of  $<0.05$  corrected for multiple comparisons (Red-Yellow) are overlaid on a mean skeleton (Green) on a standardised T1 axial brain slices (of Z-scores). The colour bar represents the degree of significance. No significant voxels were found between the two groups at baseline. At one year fractional anisotropy values of the significant voxels between the two groups are represented by the bottom boxplots. The top boxplots represent the fractional anisotropy values of the same voxels at baseline.

SUPPLEMENTAL FIGURE 2

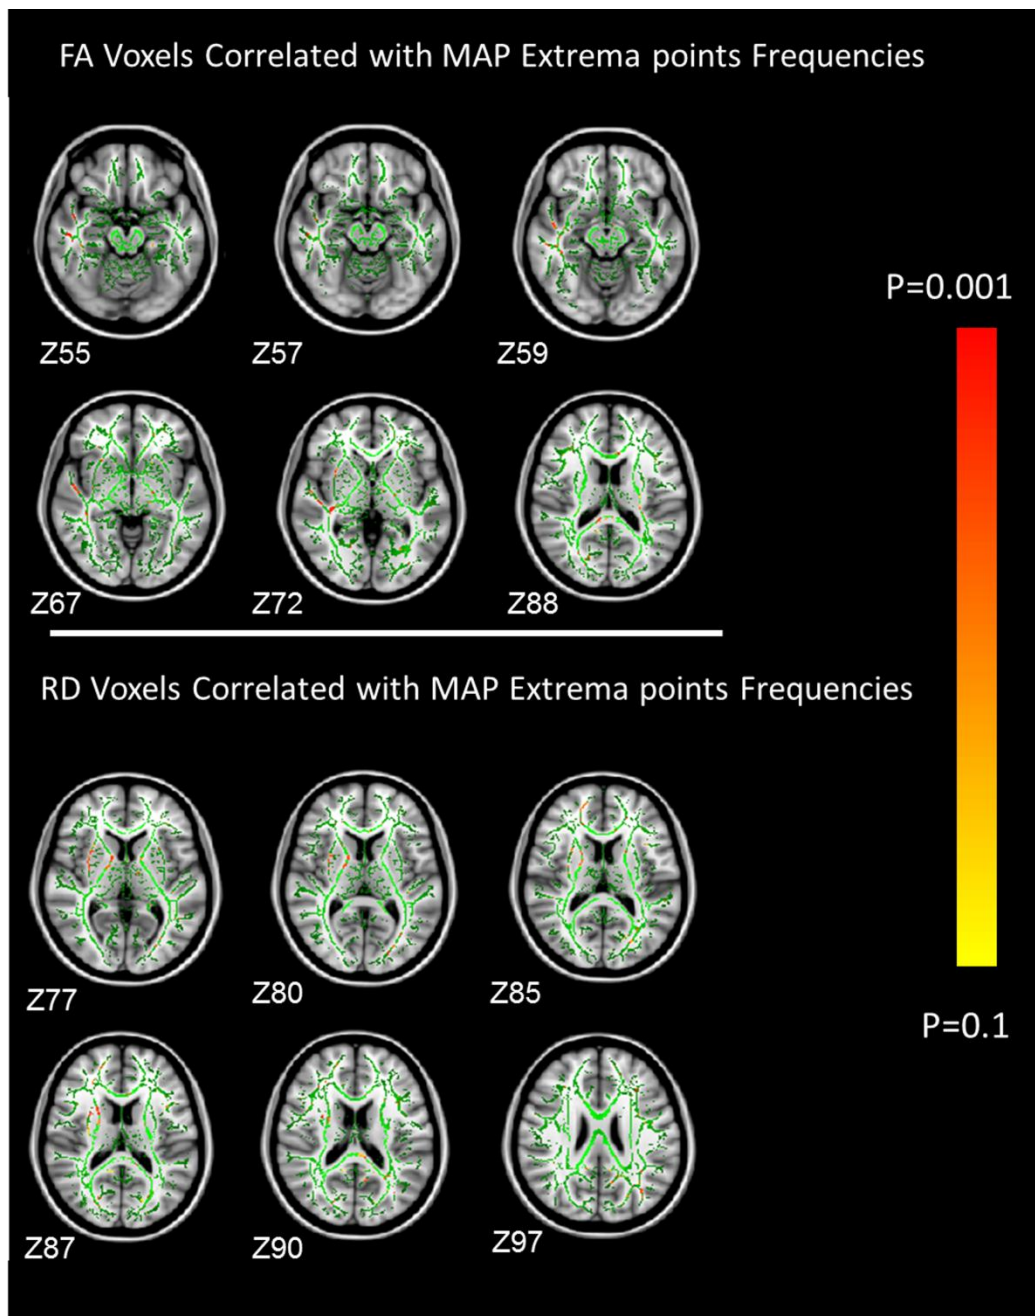

**Supplemental Figure 2** Statistical overlay of the Fractional Anisotropy (FA) and Radial Diffusivity (RD) Voxels that significantly correlated with frequencies of mean arterial blood pressure (MAP) extrema points frequencies. Fractional anisotropy positively correlated with higher frequencies of MAP extrema points whereas there was a negative correlation with Radial diffusivity.
